# Supplementary material for: Distribution of Arctic and Pacific copepods and their habitat in the northern Bering and Chukchi seas
Source: Copernicus journal article supplement (doi:10.5194/bg-13-4555-2016), 2016-08-12
Supplement: Supplementary file 1 [file bg-13-4555-2016-supplement.pdf]

Supplement of Biogeosciences, 13, 4555–4567, 2016  
<http://www.biogeosciences.net/13/4555/2016/>  
doi:10.5194/bg-13-4555-2016-supplement  
© Author(s) 2016. CC Attribution 3.0 License.

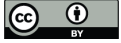

*Supplement of*

## **Distribution of Arctic and Pacific copepods and their habitat in the northern Bering and Chukchi seas**

**Hiroko Sasaki et al.**

*Correspondence to:* Hiroko Sasaki ([hiro\\_sasaki@salmon.fish.hokudai.ac.jp](mailto:hiro_sasaki@salmon.fish.hokudai.ac.jp))

The copyright of individual parts of the supplement might differ from the CC-BY 3.0 licence.

## Supplementary materials

**Figure S1.** Maximum density gradient ( $10^{-3} \text{ kg m}^{-1}$ ) at each sampling station.

**Figure S2.** Horizontal distributions of temperature ( $^{\circ}\text{C}$ ) averaged within the upper ( $T_{\text{UPP}}$ , top panels) and the bottom ( $T_{\text{BOT}}$ , bottom panels) layers at each sampling station in 2007 (left panels), 2008 (middle panels) and 2013 (right panels).

**Figure S3.** Same as figure A2 but for salinity ( $S_{\text{UPP}}$  and  $S_{\text{BOT}}$ ).

**Figure S4.** Same as figure A2 but for Chlorophyll-*a* concentration ( $\text{Chla}_{\text{UPP}}$  and  $\text{Chla}_{\text{BOT}}$ ).

**Figure S5.** Climatological mean sea ice retreat date of 1991-2013.

**Figure S6.** The anomaly of sea ice retreat at all sampling locations in 2007, 2008 and 2013 based on daily passive microwave sea ice concentrations using a threshold of 40%.

**Figure S7.** Correlation charts of with aTSR thresholds of 50 % vs. 0–40 %.

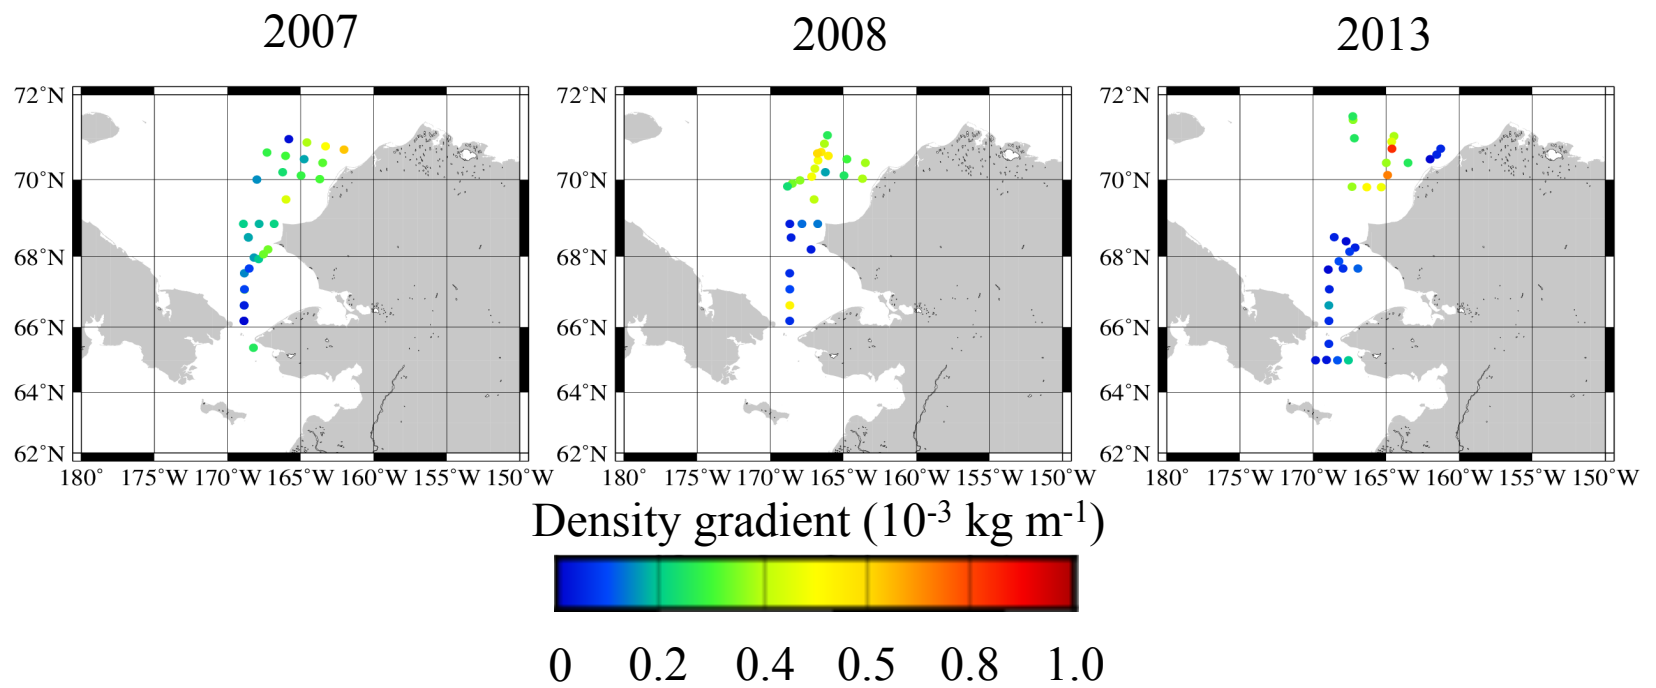

Figure S1 (Sasaki et al.)

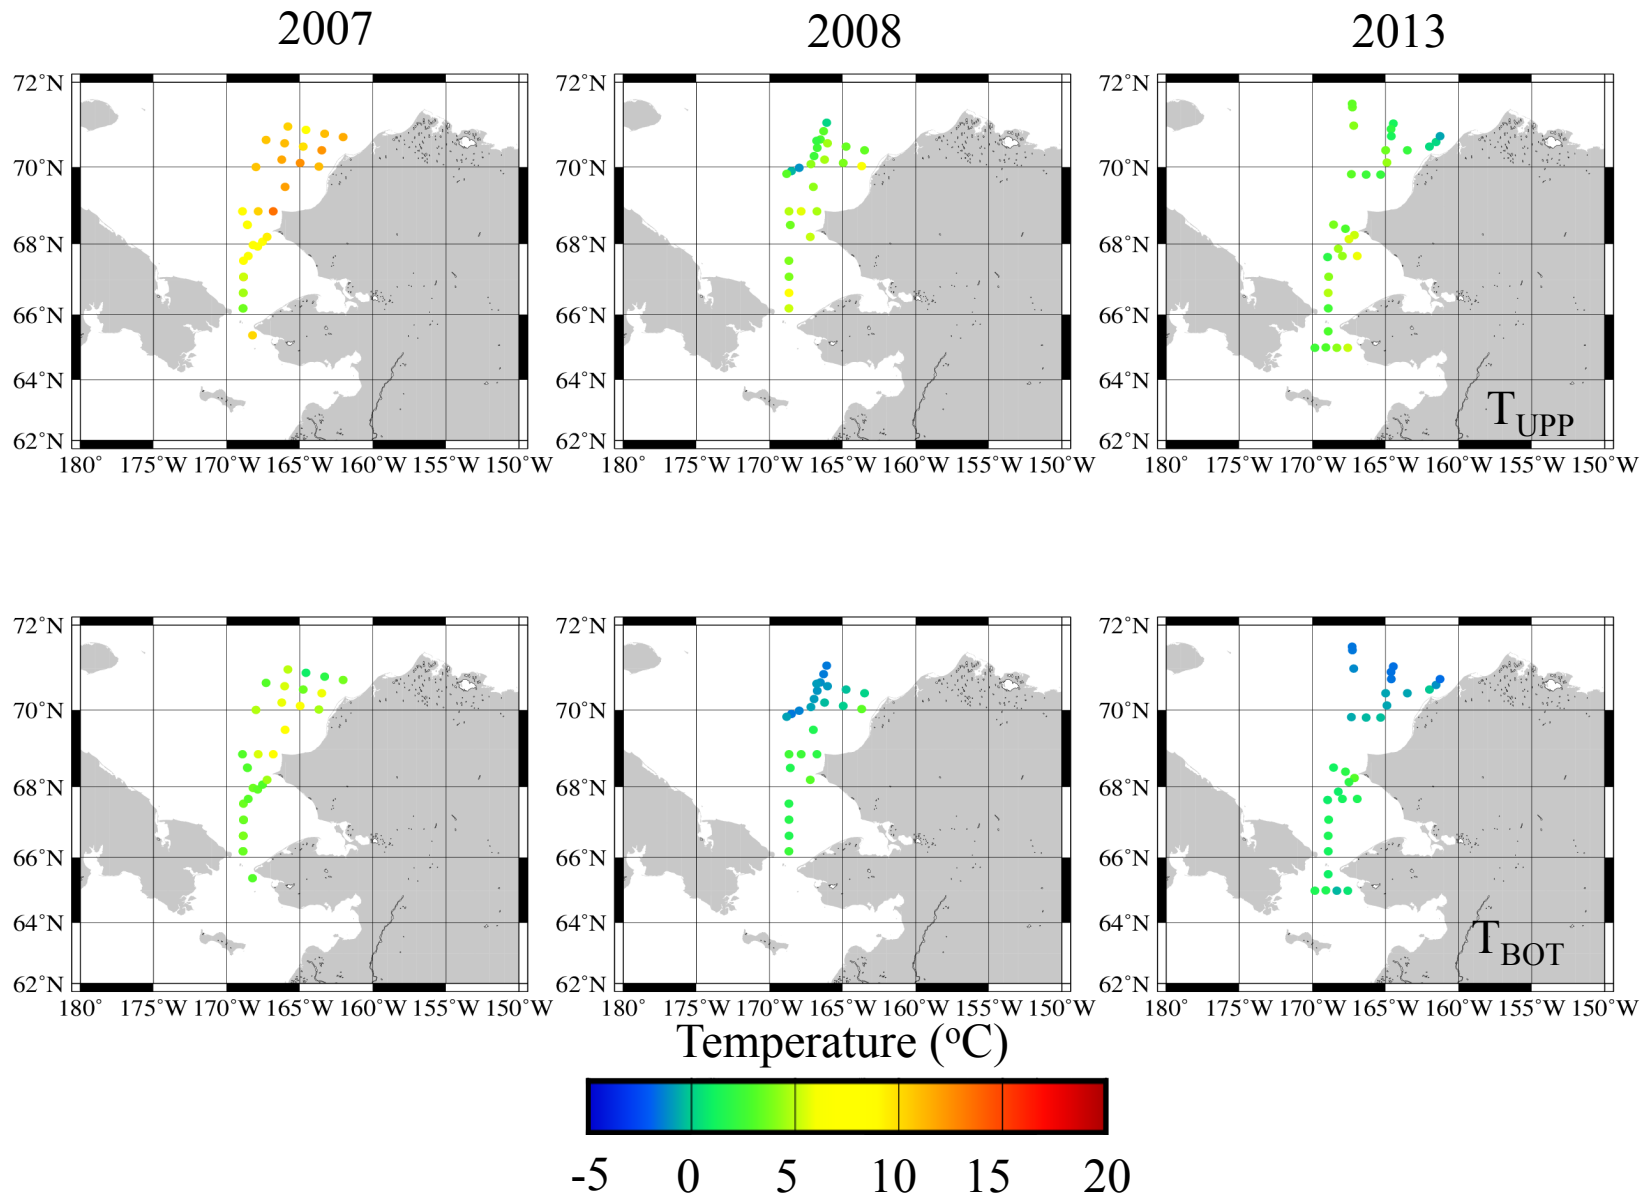

Figure S2 (Sasaki et al.)

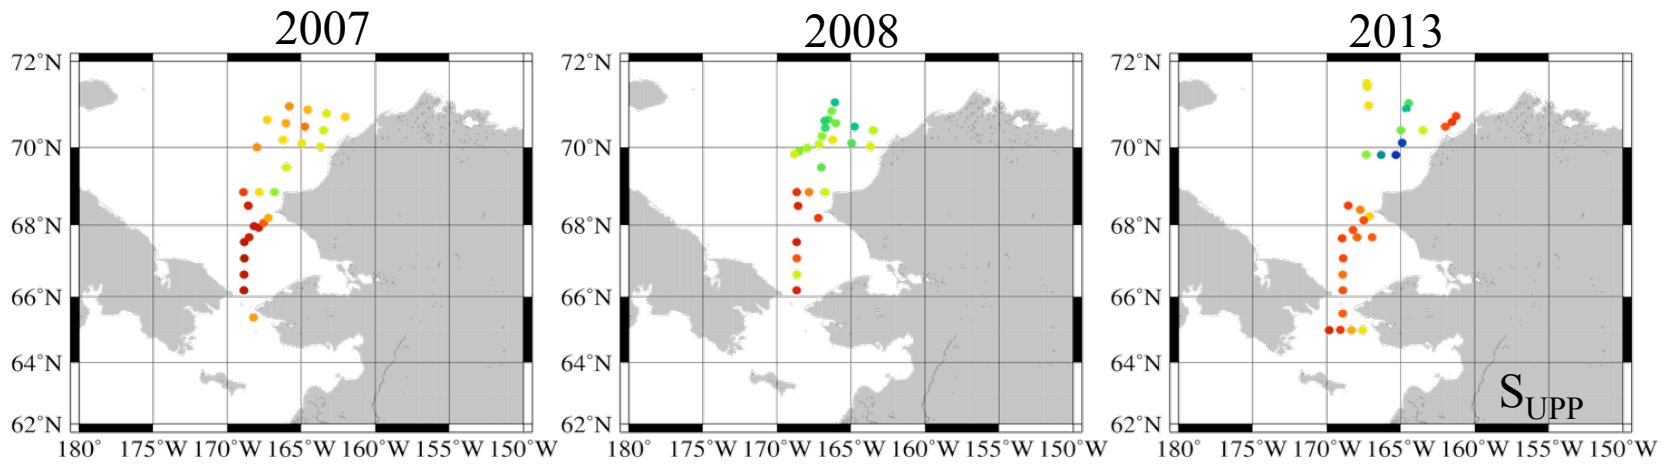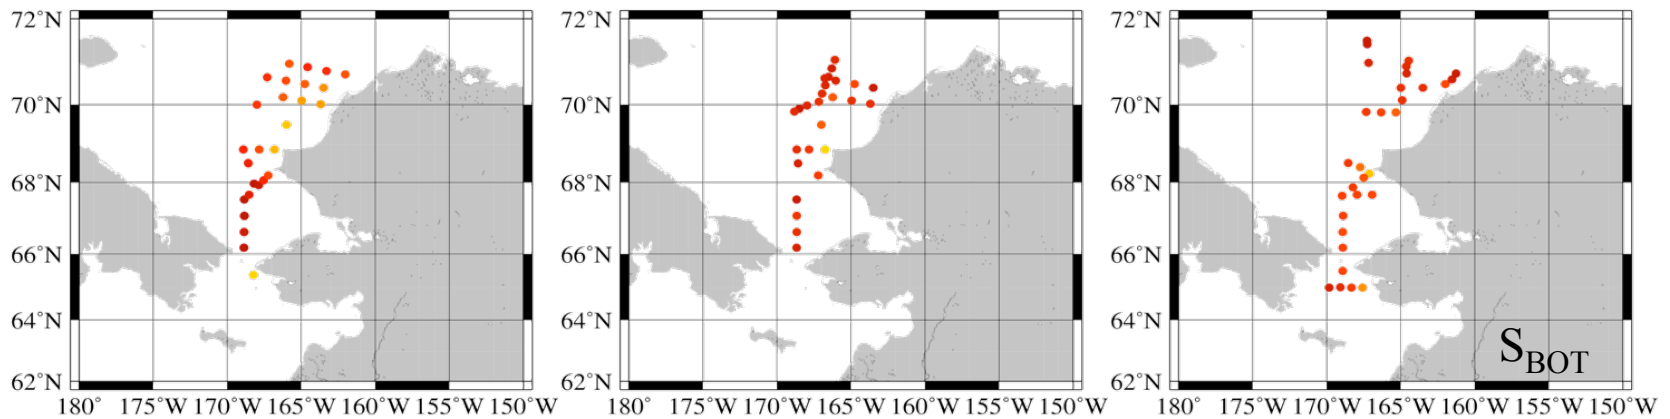

Salinity

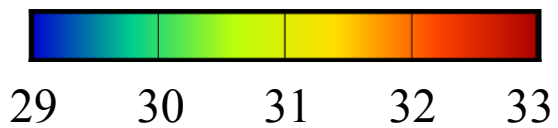

Figure S3 (Sasaki et al.)

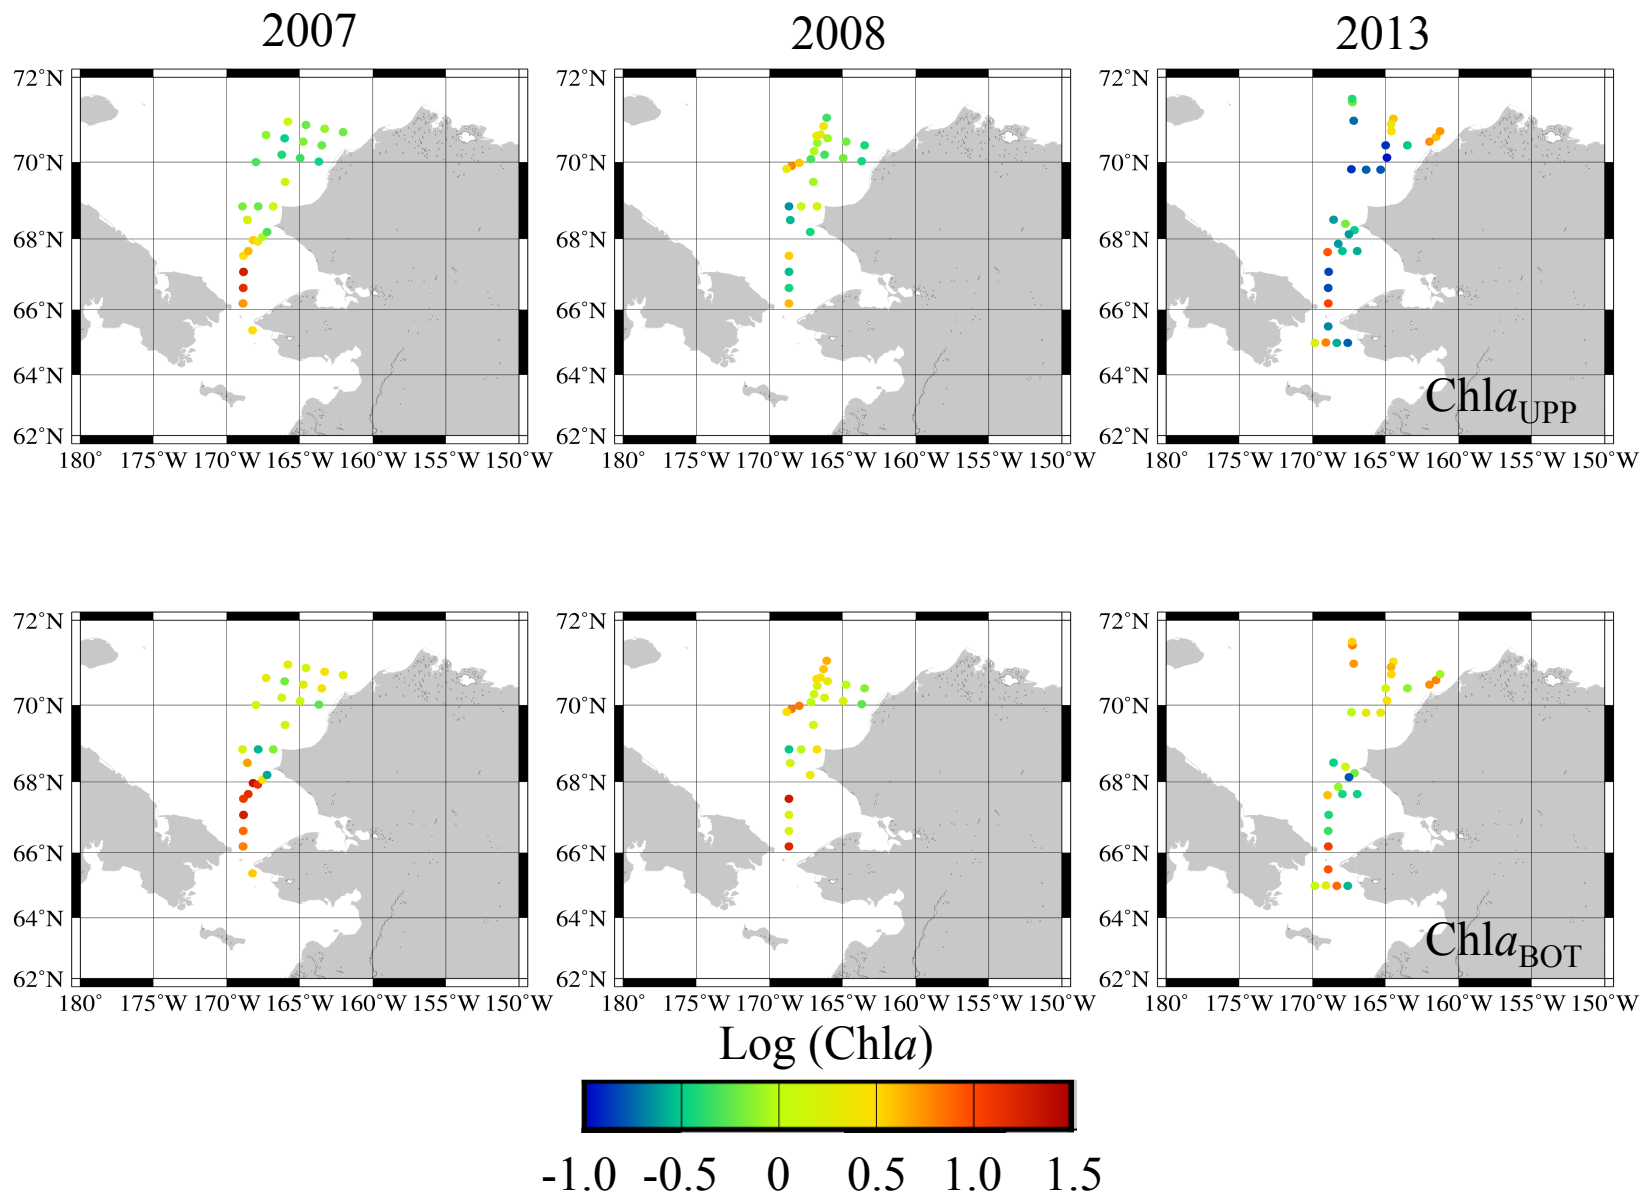

Figure S4 (Sasaki et al.)

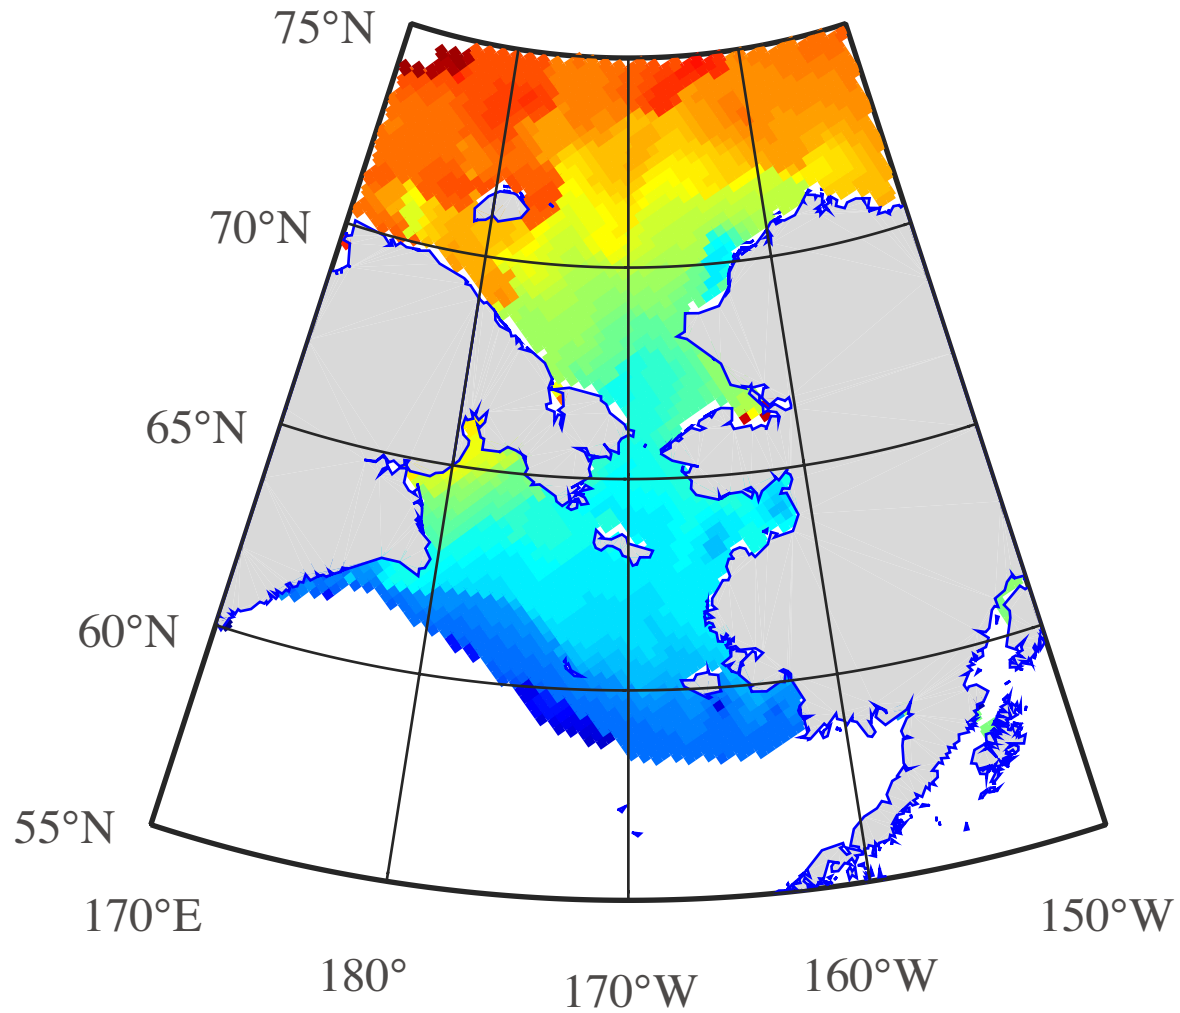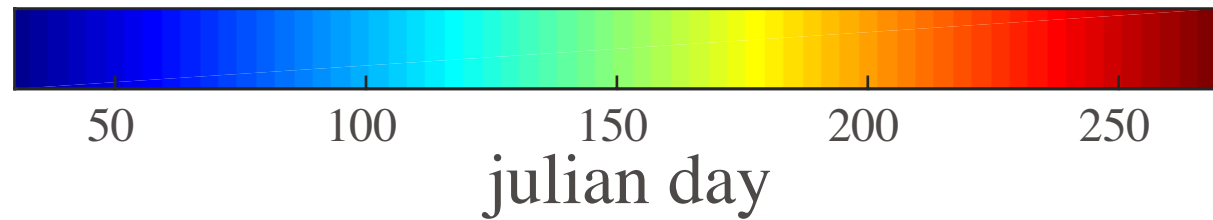

Figure S5 (Sasaki et al.)

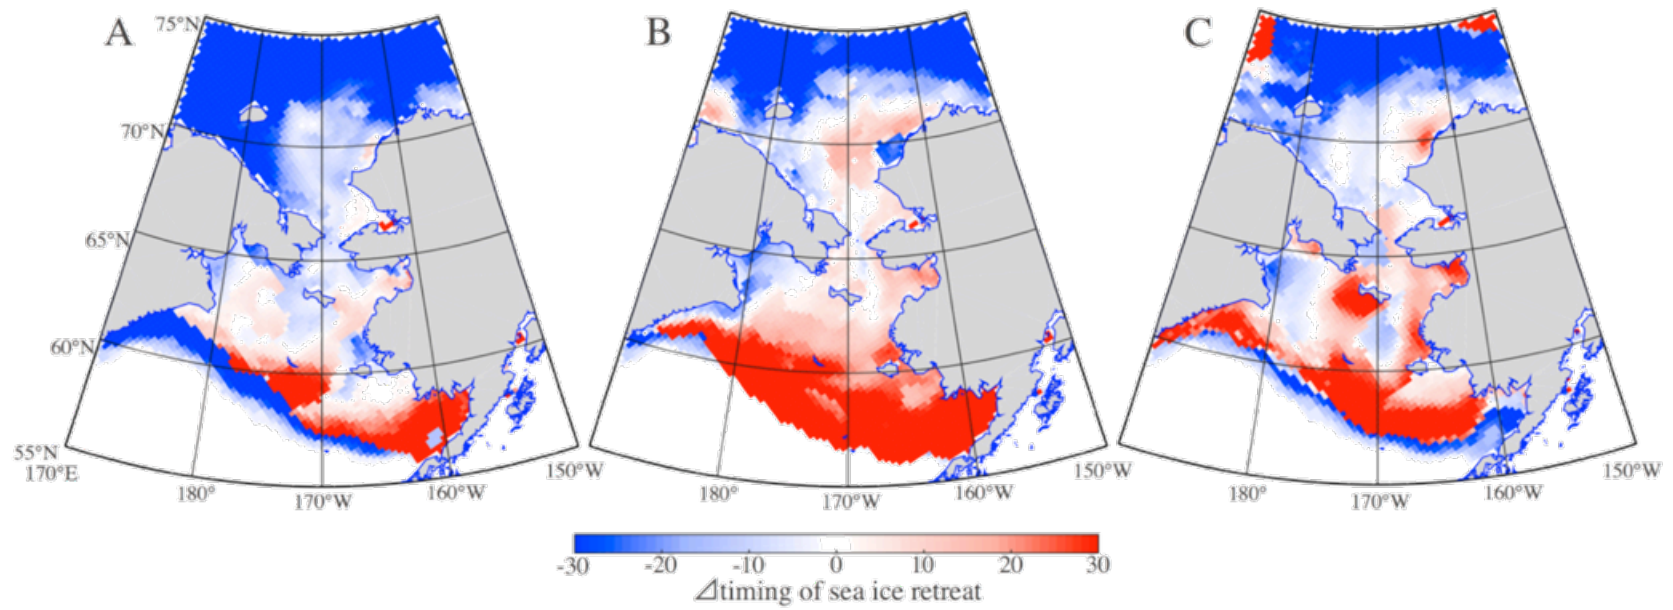

Figure S6 (Sasaki et al.)



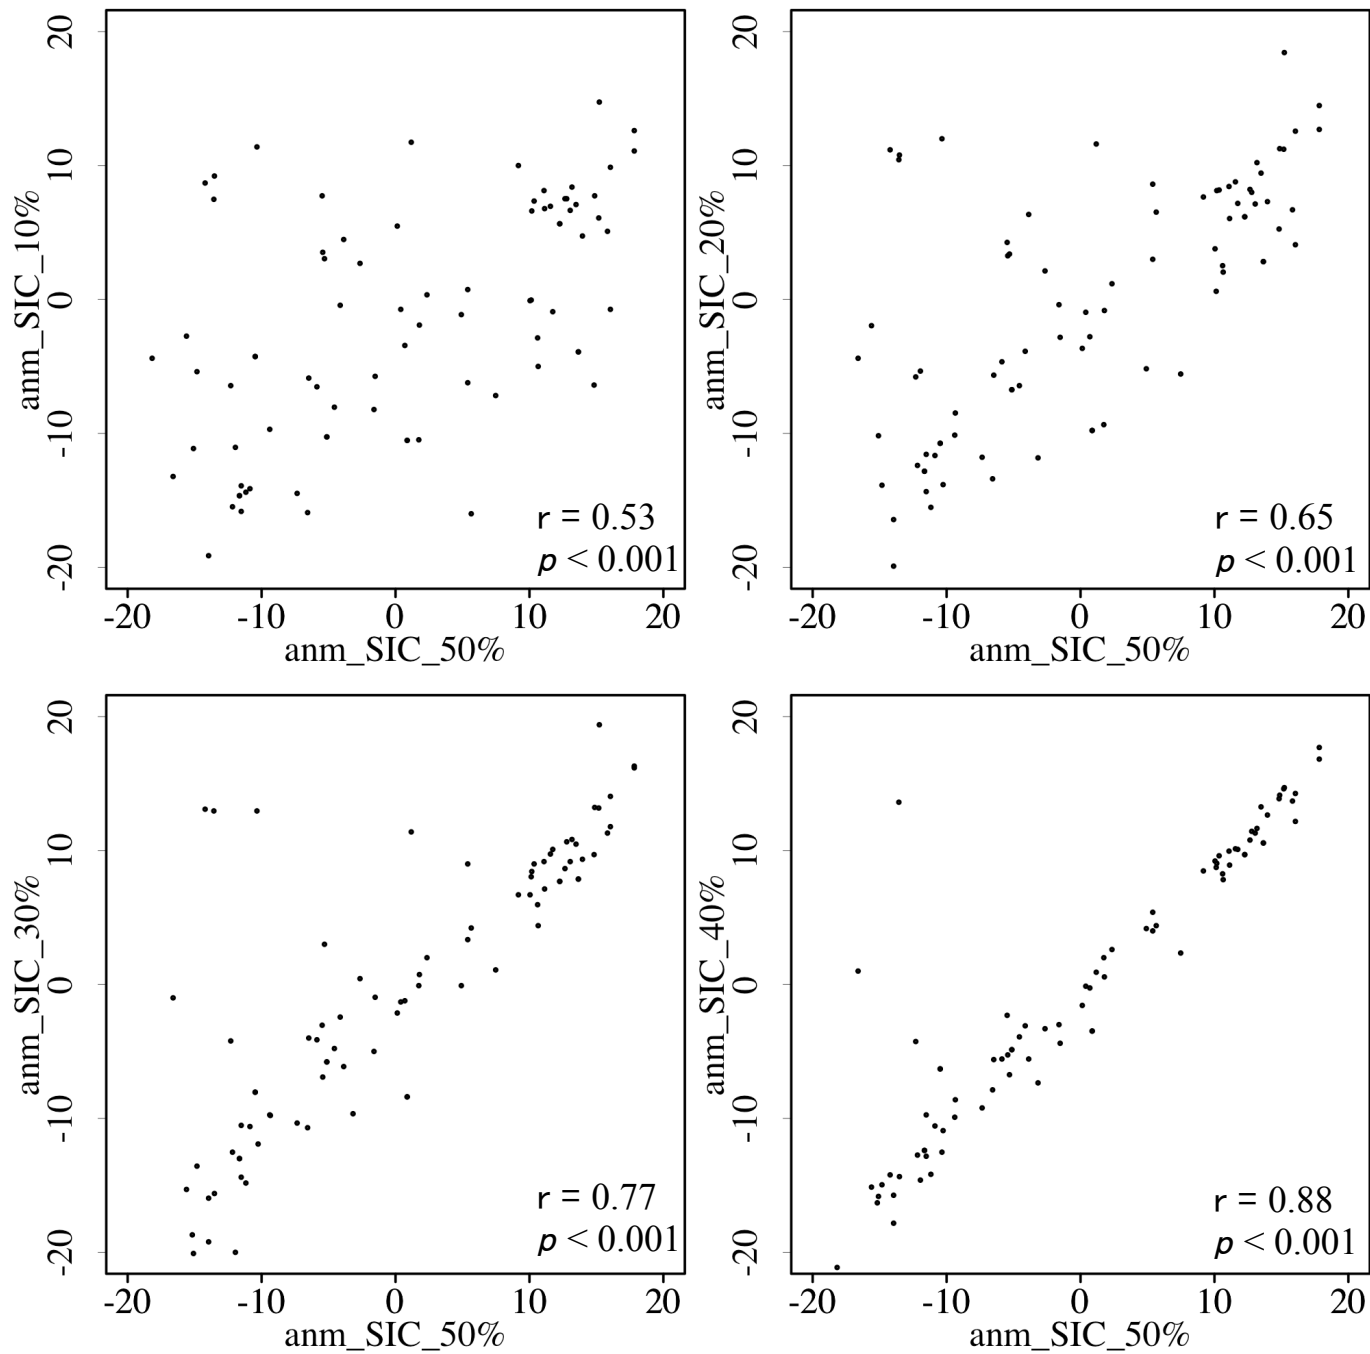

Figure S7 (Sasaki et al.)
